# Supplementary material for: Broad-Scale Genetic Diversity of Cannabis for Forensic Applications
Source: PLoS One. 2017 Jan 20;12(1):e0170522. doi: 10.1371/journal.pone.0170522 (PMC5249207; doi:10.1371/journal.pone.0170522)
Supplement: S1 Table — (XLSX) [file pone.0170522.s003.xlsx]

## Sheet: TableS1
Table S1: List and details on the Cannabis accessions. Pa: average number of private allele, Pi-sibs: probability of identity accounting for siblings, n: number of samples per accession
Crop-type	Cultivar Code	Cultivar Name	n	Origin	Supplier	Website	DNA source	Reported breeding history for hemp* and proportion of indica/sativa for drugs as indicated by the suppliers	Reported Sex-determining System	Pa	Pi-sib
Fibre	UN	Uniko B	14	Hungary	Institut de Police Scientifique, Lausanne University, Switzerland	www.unil.ch/esc/home.html	leaves	Kompolti x Fibrimon 21	Dioecious	0.153846	5.61926e-05
Fibre	KO	Kompolti	18	Hungary	Institut de Police Scientifique, Lausanne University, Switzerland	www.unil.ch/esc/home.html	leaves	Fleischmann-hemp (Italian origin)	Dioecious	0.153846	3.36733e-05
Fibre	F17a	Fedora 17	15	France	Institut de Police Scientifique, Lausanne University, Switzerland	www.unil.ch/esc/home.html	leaves	JUS 9 x Fibrimon 21	Monoecious	0	0.000105635
Fibre	F17b	Fedora 17	48	France	Eric Schweizer AG, Switzerland	www.ericschweizer.ch	seeds	JUS 9 x Fibrimon 21	Monoecious	0	5.9044e-05
Fibre	F17c	Fedora 17	34	France	Coopérative Centrale des Producteurs de Semences de Chanvre, France	-	seeds	JUS 9 x Fibrimon 21	Monoecious	0	8.64073e-05
Fibre	F12	Ferimon 12	40	France	Coopérative Centrale des Producteurs de Semences de Chanvre, France	-	seeds	Fibrimon 21	Monoecious	0	0.000405859
Fibre	S27	Santhica 27	40	France	Coopérative Centrale des Producteurs de Semences de Chanvre, France	-	seeds	n/a	Monoecious	0	0.00191174
Fibre	E68	Epsilon 68	44	France	Coopérative Centrale des Producteurs de Semences de Chanvre, France	-	seeds	n/a	Monoecious	0.0769231	0.000263165
Fibre	F75I	Futura 75	45	France	Gruppo Fibranova, Italy	www.gruppofibranova.it	seeds	Fibridia x Fibrimon 24	Monoecious	0	7.86861e-05
Fibre	F75F	Futura 75	38	France	Coopérative Centrale des Producteurs de Semences de Chanvre, France	-	seeds	Fibridia x Fibrimon 24	Monoecious	0	7.76339e-05
Fibre	F32	Felina 32	35	France	Coopérative Centrale des Producteurs de Semences de Chanvre, France	-	seeds	Kompolti x Fibrimon 24	Monoecious	0.230769	0.000356241
Fibre	F34	Felina 34	47	France	Eric Schweizer AG, Switzerland	www.ericschweizer.ch	seeds	Kompolti x Fibrimon 24	Monoecious	0.0769231	0.000234083
Fibre	J14	Juso 14	9	Ukraine	Norddeutsche Pflanzenzucht/Deutschland	www.npz.de	seeds	JUS 6 x Odnodomnaya Bernburga	Monoecious	0	0.000845813
Fibre	BIA	Bialobrzeskie	49	Poland	Institute of Natural Fibres and Medicinal Plants, Poland	stara.inf.poznan.pl	seeds	(((LKCSD x Kompolti) x Bredemann 18) x Fibrimon 24)	Monoecious	0.230769	0.00112085
Fibre	BEN	Beniko	50	Poland	Institute of Natural Fibres and Medicinal Plants, Poland	stara.inf.poznan.pl	seeds	Fibrimon 21 x Fibrimon 24	Monoecious	0.0769231	0.0029462
Fibre	CHP	Chamaeleon	47	Netherlands	Institute of Natural Fibres and Medicinal Plants, Poland	stara.inf.poznan.pl	seeds	n/a	Dioecious	0.0769231	0.000214156
Fibre	CHNL	Chamaeleon	39	Netherlands	PRI-Wageningen/NL		seeds	n/a	Dioecious	0	0.000243553
Fibre	CAP	Carmagnola	44	Italy	Institute of Natural Fibres and Medicinal Plants, Poland	stara.inf.poznan.pl	seeds	Landrace	Dioecious	0.307692	2.36734e-05
Fibre	CAI	Carmagnola	13	Italy	Gruppo Fibranova, Italy	www.gruppofibranova.it	seeds	Landrace	Dioecious	0	3.6191e-05
Fibre	CAS	Carmagnola selezionata	50	Italy	Gruppo Fibranova, Italy	www.gruppofibranova.it	seeds	Carmagnola	Dioecious	0	0.000113012
Fibre	TI	Tiborszallasi	45	Hungary	Gruppo Fibranova, Italy	www.gruppofibranova.it	seeds	Landrace	Dioecious	0.384615	2.24545e-05
Fibre	FI	Fibranova	37	Italy	Gruppo Fibranova, Italy	www.gruppofibranova.it	seeds	Bredemann Eletta x Carmagnola	Dioecious	0.153846	4.24088e-05
Fibre	DL	Delta-llosa	20	Spain	Semillas Castells, Spain	www.grupocastells.com	seeds	n/a	Monoecious	0	0.00447277
Fibre	D405	Delta-405	13	Spain	Semillas Castells, Spain	www.grupocastells.com	seeds	n/a	Monoecious	0	0.0045978
Fibre	NOVG37	Novgorod-Seversky, cv	23	Ukraine	Vavilov Institute of Plant Genetic Resources, Russia	www.vir.nw.ru	seeds	Landrace	Dioecious	0.230769	2.95218e-05
Fibre	BER223	Bernburgskaya Odnodomnaya, bm	22	DDR	Vavilov Institute of Plant Genetic Resources, Russia	www.vir.nw.ru	seeds	n/a	Monoecious	0.230769	9.37487e-05
Fibre	SZE449	Szegedi 9	23	Hungary	Vavilov Institute of Plant Genetic Resources, Russia	www.vir.nw.ru	seeds	Tiborszallasi	Dioecious	0.230769	2.5272e-05
Fibre	FIB467	Fibrimulta 151	23	Romania	Vavilov Institute of Plant Genetic Resources, Russia	www.vir.nw.ru	seeds	(Italian x Turkish strains) x Fibridia	Dioecious	0.0769231	0.000252942
Fibre	GLU493	Glukhovskaya 10 Zheltostebel'naya	23	Ukraine	Vavilov Institute of Plant Genetic Resources, Russia	www.vir.nw.ru	seeds	Novgorod-Seversk	Dioecious	0	2.06732e-05
Fibre	KRA507	Krasnodarsky 10 FB	24	USSR	Vavilov Institute of Plant Genetic Resources, Russia	www.vir.nw.ru	seeds	Local caucasian x Italian strains	-	0.230769	0.000141614
Drug	ARa	Alpine Rocket	20	-	Institut de Police Scientifique, Lausanne University, Switzerland	www.unil.ch/esc/home.html	leaves	mostly indica	Dioecious	0	0.00285438
Drug	ARb	Alpine Rocket	30	-	Police seizure Fribourg, Switzerland	-	leaves	mostly indica	Dioecious	0	0.0260303
Drug	HK	Hindu Kush	25	-	Sensi Seeds	sensiseeds.com	seeds	pure indica	Dioecious	0	0.000569333
Drug	NL	Northern Light	16	-	Nirvana	www.nirvanashop.com	seeds	mostly indica	Dioecious	0	7.75734e-05
Drug	SW	Snow White	12	-	Shop, Switzerland	-	leaves	mostly indica	Dioecious	0	0.0176035
Drug	T44a	Top 44	13	-	Shop, Switzerland	-	leaves	mostly indica	Dioecious	0	0.00708706
Drug	T44b	Top 44	36	-	Police seizure Vaud Switzerland	-	leaves	mostly indica	Dioecious	0	0.0106874
Drug	FFb	F1 Fraise	21	-	Institut de Police Scientifique, Lausanne University, Switzerland	www.unil.ch/esc/home.html	leaves	indica/sativa	Dioecious	0	0.0298746
Drug	B52	B52	20	-	Institut de Police Scientifique, Lausanne University, Switzerland	www.unil.ch/esc/home.html	leaves	indica/sativa	Dioecious	0	0.0145913
Drug	PM	Peace Maker	13	-	Institut de Police Scientifique, Lausanne University, Switzerland	www.unil.ch/esc/home.html	leaves	mostly indica	Dioecious	0	0.000954578
Drug	BB	Big Bud	13	-	Shop, Switzerland	-	leaves	indica/sativa	Dioecious	0	0.00049369
Drug	BS	Big Skunk	13	-	Shop, Switzerland	-	leaves	indica/sativa	Dioecious	0	5.60671e-05
Drug	FFa	F Fraise	19	-	Institut de Police Scientifique, Lausanne University, Switzerland	www.unil.ch/esc/home.html	leaves	mostly sativa	Dioecious	0	0.00234548
Drug	HMW	Hawaii Maui Waui	16	-	Nirvana	www.nirvanashop.com	seeds	mostly sativa	Dioecious	0	5.60457e-05
Drug	HA	Haze	19	-	Nirvana	www.nirvanashop.com	seeds	mostly sativa	Dioecious	0.0769231	0.000296421
Drug	SWA	Swaziland	22	-	Nirvana	www.nirvanashop.com	seeds	pure sativa	Dioecious	0.153846	0.00120594
Drug	MS	Mexican Sativa	20	-	Nirvana	www.nirvanashop.com	seeds	pure sativa	Dioecious	0	0.000123717
Drug	RI	Ruderalis Indica	24	-	Sensi Seeds	sensiseeds.com	seeds	ruderalis/indica	Dioecious	0.153846	0.000362754
*de Meijer 1995 JIHA 2:66-73
